# Supplementary material for: Trends in the prevalence and social determinants of stunting in India, 2005–2021: findings from three rounds of the National Family Health Survey
Source: PubMed Central journal article supplement — BMJ Nutr Prev Health. 2023 Dec 6;6(2):357–66. doi: 10.1136/bmjnph-2023-000648 (PMC11009545; doi:10.1136/bmjnph-2023-000648), 2023-12-06
Supplement: bmjnph-2023-000648supp001.pdf [file bmjnph-2023-000648supp001.pdf]

## Supplementary Material

### Contents

|                                                                                                                                                                                                                     |    |
|---------------------------------------------------------------------------------------------------------------------------------------------------------------------------------------------------------------------|----|
| Table S1. Sample representation from NFHS-3 – NFHS-5 for children under five years .....                                                                                                                            | 2  |
| Table S2. Results for the logistic regression analysis with all the included covariates .....                                                                                                                       | 4  |
| Table S3. Results for the Poisson regression analysis with all the included covariates .....                                                                                                                        | 12 |
| Table S4. Results of the logistic regression for 64 intersecting subgroups of marginalised social group, household wealth, maternal education, and residence in NFHS-5 .....                                        | 17 |
| Figure S1. Graph illustrating the Adjusted Odds Ratios of the 64 intersecting subgroups of household wealth, maternal education, urban/rural residence, and marginalised social groups in NFHS-5.....               | 20 |
| Figure S2. Graph illustrating the Adjusted Odds Ratios of the intersecting subgroups for marginalised social groups and urban/rural residence for children who were poor and had illiterate mothers in NFHS-5 ..... | 21 |
| Figure S3. Graph illustrating the Adjusted Odds Ratios of the intersecting groups of marginalised social groups, urban/rural residence, household wealth, and maternal education .....                              | 22 |
| Table S5. Results of the Kitagawa-Oaxaca-Blinder Decomposition (LPM) analysis for the selected social factors using NFHS-3 coefficients as counterfactuals .....                                                    | 23 |
| Table S6. Results of the detailed Kitagawa-Oaxaca-Blinder decomposition (LPM) using NFHS-3 coefficients as counterfactuals .....                                                                                    | 24 |
| Table S7. Results for the Kitagawa-Oaxaca-Blinder decomposition (Logit) for changes in stunting prevalence between NFHS-3 and NFHS-5 using NFHS-3 coefficients as counterfactuals .....                             | 31 |
| Table S8. Results for the detailed Kitagawa-Oaxaca-Blinder decomposition (Logit) using NFHS-3 coefficients as counterfactuals for the predictor and control variables.....                                          | 32 |
| Table S9. Results of the Kitagawa-Oaxaca-Blinder decomposition using NFHS-5 coefficients as counterfactuals .....                                                                                                   | 33 |

Table S1. Sample representation from NFHS-3 – NFHS-5 for children under five years

|                                                                                    | <b>NFHS-3<br/>(2005-2006)<br/>children under<br/>five years<br/>(% of total<br/>sample)</b> | <b>NFHS-4<br/>(2015-2016)<br/>children under<br/>five years<br/>(% of total<br/>sample)</b> | <b>NFHS-5<br/>(2019-2021)<br/>children under<br/>five years<br/>(% of total<br/>sample)</b> |
|------------------------------------------------------------------------------------|---------------------------------------------------------------------------------------------|---------------------------------------------------------------------------------------------|---------------------------------------------------------------------------------------------|
| Total Pre-analytical Data<br>(513, 855)                                            | 48, 084 (9.36%)                                                                             | 244, 508<br>(47.58%)                                                                        | 221, 263<br>(43.06%)                                                                        |
|                                                                                    | <b>Sample of NFHS<br/>round (%)</b>                                                         | <b>Sample of<br/>NFHS round<br/>(%)</b>                                                     | <b>Sample of NFHS<br/>round (%)</b>                                                         |
| <b>Dependent Variable - Stunting</b>                                               |                                                                                             |                                                                                             |                                                                                             |
| Non-flagged observations                                                           | 41, 306 (85.90%)                                                                            | 225, 002<br>(92.02%)                                                                        | 206, 025<br>(93.11%)                                                                        |
| Flagged observations                                                               | 6,778 (14.10%)                                                                              | 19,506 (7.98%)                                                                              | 15,238 (6.89%)                                                                              |
| Missing observations                                                               | ---                                                                                         | ---                                                                                         | ---                                                                                         |
| Flags and Missing value<br>contributions                                           | 6,778 (14.10%)                                                                              | 19,506 (7.98%)                                                                              | 15,238 (6.89%)                                                                              |
| <b>Predictors – Used as controls in the regressions and decomposition analyses</b> |                                                                                             |                                                                                             |                                                                                             |
| <b>Marginalised Social Group</b>                                                   |                                                                                             |                                                                                             |                                                                                             |
| Flagged observations                                                               | 2,093 (4.35%)                                                                               | 10,767 (4.40%)                                                                              | 11,041 (4.99%)                                                                              |
| Missing observations                                                               | ---                                                                                         | ---                                                                                         | ---                                                                                         |
| Total (23,901, 4.65%)                                                              |                                                                                             |                                                                                             |                                                                                             |
| <b>ICDS Utilisation in the last<br/>12 Months</b>                                  |                                                                                             |                                                                                             |                                                                                             |
| Flagged observations                                                               | 121 (0.25%)                                                                                 | ---                                                                                         | ---                                                                                         |
| Missing observations                                                               | ---                                                                                         | ---                                                                                         | ---                                                                                         |
| Total (121, 0.02%)                                                                 |                                                                                             |                                                                                             |                                                                                             |
| <b>Private Institutional<br/>Delivery</b>                                          |                                                                                             |                                                                                             |                                                                                             |
| Flagged observations                                                               | 18 (0.04%)                                                                                  | ---                                                                                         | ---                                                                                         |
| Missing observations                                                               | ---                                                                                         | ---                                                                                         | ---                                                                                         |
| Total (18, 0.00%)                                                                  |                                                                                             |                                                                                             |                                                                                             |
| <b>Mother's Media Exposure</b>                                                     |                                                                                             |                                                                                             |                                                                                             |
| Flagged observations                                                               | 38 (0.08%)                                                                                  | ---                                                                                         | ---                                                                                         |
| Missing observations                                                               | ---                                                                                         | ---                                                                                         | ---                                                                                         |
| Total (38, 0.01%)                                                                  |                                                                                             |                                                                                             |                                                                                             |
| <b>Mother's Height</b>                                                             |                                                                                             |                                                                                             |                                                                                             |
| Flagged observations                                                               | 1,990 (4.14%)                                                                               | 2,831 (1.16%)                                                                               | 5,543 (2.51%)                                                                               |

|                                                                                                                                                                             |               |                  |                  |
|-----------------------------------------------------------------------------------------------------------------------------------------------------------------------------|---------------|------------------|------------------|
| Missing observations                                                                                                                                                        | ---           | ---              | ---              |
| Total (10,364, 2.02%)                                                                                                                                                       | ---           | ---              | ---              |
| <b>Mother's Balanced Diet</b>                                                                                                                                               |               |                  |                  |
| Flagged observations                                                                                                                                                        | ---           | ---              | ---              |
| Missing observations                                                                                                                                                        | 103 (0.21%)   | ---              | ---              |
| Total (103, 0.02%)                                                                                                                                                          |               |                  |                  |
| <b>Mother's Age at First Birth</b>                                                                                                                                          |               |                  |                  |
| Flagged observations                                                                                                                                                        | 3 (0.01%)     | 231 (0.09%)      | 33 (0.01%)       |
| Missing observations                                                                                                                                                        | ---           | ---              | ---              |
| Total (267, 0.05%)                                                                                                                                                          |               |                  |                  |
| <b>No Toilet Facility in the Household</b>                                                                                                                                  |               |                  |                  |
| Flagged observations                                                                                                                                                        | 55 (0.11%)    | ---              | 1 (0.00%)        |
| Missing observations                                                                                                                                                        | ---           | ---              | ---              |
| Total (56, 0.01%)                                                                                                                                                           |               |                  |                  |
| <b>Safe Water Facility</b>                                                                                                                                                  |               |                  |                  |
| Flagged observations                                                                                                                                                        | 4 (0.01%)     | ---              | ---              |
| Missing observations                                                                                                                                                        | ---           | ---              | ---              |
| Total (4, 0.00%)                                                                                                                                                            |               |                  |                  |
| Final analytic sample after removing flags associated with the stunting (471, 333)                                                                                          | 41, 306       | 225, 002         | 206, 025         |
| Final analytic sample after removing flags and missing values associated with stunting (dependent variable) and all the predictor variables used in the analysis (443, 039) | 38, 996 (81%) | 211, 729 (86.6%) | 192, 314 (86.9%) |
| Total flags and missing value contributions for dependent variable and independent variables considered                                                                     | 9,088 (19%)   | 32, 779 (13.4%)  | 28, 949 (13.1%)  |

Table S.2. Results for the logistic regression analysis with all the included covariates

|                                  | NFHS-3 (2005-2006)                 |           | NFHS-4 (2015-2016)                 |           | NFHS-5 (2019-2021)                 |           |
|----------------------------------|------------------------------------|-----------|------------------------------------|-----------|------------------------------------|-----------|
|                                  | Adjusted Odds Ratio (AOR) [95% CI] | P-values  | Adjusted Odds Ratio (AOR) [95% CI] | P-values  | Adjusted Odds Ratio (AOR) [95% CI] | P-values  |
| <b>Wealth Quintile</b>           |                                    |           |                                    |           |                                    |           |
| Poorest                          | Ref                                | Ref       | Ref                                | Ref       | Ref                                | Ref       |
| Poorer                           | 0.775<br>[0.710,0.846]             | (<0.0001) | 0.905<br>[0.872,0.939]             | (<0.0001) | 0.924<br>[0.884,0.964]             | (0.0003)  |
| Middle                           | 0.675<br>[0.598,0.762]             | (<0.0001) | 0.803<br>[0.765,0.844]             | (<0.0001) | 0.834<br>[0.794,0.876]             | (<0.0001) |
| Richer                           | 0.497<br>[0.420,0.589]             | (<0.0001) | 0.701<br>[0.652,0.753]             | (<0.0001) | 0.706<br>[0.665,0.749]             | (<0.0001) |
| Richest                          | 0.363<br>[0.292,0.450]             | (<0.0001) | 0.619<br>[0.565,0.678]             | (<0.0001) | 0.636<br>[0.588,0.688]             | (<0.0001) |
|                                  |                                    |           |                                    |           |                                    |           |
| <b>Marginalised Social Group</b> |                                    |           |                                    |           |                                    |           |
| Unreserved category              | Ref                                | Ref       | Ref                                | Ref       | Ref                                | Ref       |
| SC                               | 1.158<br>[1.048,1.279]             | (0.0039)  | 1.207<br>[1.148,1.268]             | (<0.0001) | 1.210<br>[1.149,1.274]             | (<0.0001) |
| ST                               | 1.139<br>[1.002,1.296]             | (0.0471)  | 1.155<br>[1.089,1.224]             | (<0.0001) | 1.191<br>[1.116,1.271]             | (<0.0001) |
| OBC                              | 1.061<br>[0.970,1.160]             | (0.1963)  | 1.109<br>[1.063,1.156]             | (<0.0001) | 1.110<br>[1.058,1.165]             | (<0.0001) |
|                                  |                                    |           |                                    |           |                                    |           |
| <b>Religion</b>                  |                                    |           |                                    |           |                                    |           |
| Hindu                            | Ref                                | Ref       | Ref                                | Ref       | Ref                                | Ref       |
| Muslim                           | 1.142<br>[1.025,1.273]             | (0.0164)  | 1.154<br>[1.104,1.207]             | (<0.0001) | 1.166<br>[1.108,1.227]             | (<0.0001) |
| Christian                        | 1.285<br>[1.034,1.596]             | (0.0237)  | 0.941<br>[0.837,1.058]             | (0.3087)  | 0.960<br>[0.843,1.092]             | (0.5318)  |
| Other Religion                   | 1.195<br>[0.989,1.443]             | (0.0644)  | 1.064<br>[0.934,1.213]             | (0.3506)  | 0.985<br>[0.878,1.106]             | (0.8037)  |
|                                  |                                    |           |                                    |           |                                    |           |
| <b>Residence</b>                 |                                    |           |                                    |           |                                    |           |
| Rural                            | Ref                                | Ref       | Ref                                | Ref       | Ref                                | Ref       |
| Urban                            | 1.179<br>[1.074,1.293]             | (0.0005)  | 1.037<br>[0.992,1.084]             | (0.1055)  | 1.015<br>[0.970,1.063]             | (0.5151)  |
|                                  |                                    |           |                                    |           |                                    |           |

|                                     |                        |           |                        |           |                        |           |
|-------------------------------------|------------------------|-----------|------------------------|-----------|------------------------|-----------|
| <b>Maternal Education</b>           |                        |           |                        |           |                        |           |
| Illiterate                          | Ref                    | Ref       | Ref                    | Ref       | Ref                    | Ref       |
| Primary                             | 0.868<br>[0.795,0.948] | (0.0016)  | 0.895<br>[0.857,0.934] | (<0.0001) | 0.926<br>[0.883,0.972] | (0.0017)  |
| Secondary                           | 0.795<br>[0.730,0.867] | (<0.0001) | 0.774<br>[0.746,0.804] | (<0.0001) | 0.814<br>[0.782,0.848] | (<0.0001) |
| Higher                              | 0.637<br>[0.530,0.767] | (<0.0001) | 0.641<br>[0.596,0.688] | (<0.0001) | 0.698<br>[0.657,0.743] | (<0.0001) |
|                                     |                        |           |                        |           |                        |           |
| <b>Sex of the Child</b>             |                        |           |                        |           |                        |           |
| Female                              | Ref                    | Ref       | Ref                    | Ref       | Ref                    | Ref       |
| Male                                | 1.003<br>[0.949,1.060] | (0.9218)  | 1.069<br>[1.041,1.097] | (<0.0001) | 1.080<br>[1.052,1.110] | (<0.0001) |
|                                     |                        |           |                        |           |                        |           |
| <b>Age of the Child (in months)</b> |                        |           |                        |           |                        |           |
| 0                                   | Ref                    | Ref       | Ref                    | Ref       | Ref                    | Ref       |
| 1                                   | 1.595<br>[0.870,2.922] | (0.1310)  | 1.162<br>[0.851,1.585] | (0.3444)  | 0.911<br>[0.743,1.116] | (0.3669)  |
| 2                                   | 1.348<br>[0.747,2.432] | (0.3216)  | 1.458<br>[1.070,1.987] | (0.0169)  | 0.740<br>[0.610,0.897] | (0.0022)  |
| 3                                   | 1.168<br>[0.646,2.114] | (0.6068)  | 1.480<br>[1.094,2.002] | (0.0111)  | 0.628<br>[0.518,0.761] | (<0.0001) |
| 4                                   | 1.262<br>[0.700,2.274] | (0.4391)  | 1.232<br>[0.909,1.669] | (0.1782)  | 0.599<br>[0.495,0.724] | (<0.0001) |
| 5                                   | 1.394<br>[0.783,2.481] | (0.2589)  | 1.301<br>[0.959,1.766] | (0.0913)  | 0.653<br>[0.535,0.798] | (<0.0001) |
| 6                                   | 1.603<br>[0.904,2.842] | (0.1063)  | 1.202<br>[0.886,1.631] | (0.2377)  | 0.599<br>[0.494,0.727] | (<0.0001) |
| 7                                   | 2.026<br>[1.155,3.554] | (0.0138)  | 1.283<br>[0.949,1.733] | (0.1048)  | 0.703<br>[0.575,0.860] | (0.0006)  |
| 8                                   | 2.133<br>[1.218,3.738] | (0.0081)  | 1.441<br>[1.068,1.944] | (0.0169)  | 0.743<br>[0.611,0.903] | (0.0028)  |
| 9                                   | 2.240<br>[1.267,3.960] | (0.0055)  | 1.692<br>[1.258,2.275] | (0.0005)  | 0.719<br>[0.594,0.869] | (0.0007)  |

|    |                          |           |                        |           |                        |           |
|----|--------------------------|-----------|------------------------|-----------|------------------------|-----------|
| 10 | 2.883<br>[1.613,5.154]   | (0.0004)  | 1.830<br>[1.348,2.484] | (0.0001)  | 0.828<br>[0.678,1.012] | (0.0659)  |
| 11 | 3.676<br>[2.051,6.588]   | (<0.0001) | 2.211<br>[1.636,2.988] | (<0.0001) | 0.914<br>[0.757,1.104] | (0.3510)  |
| 12 | 3.691<br>[2.082,6.543]   | (<0.0001) | 2.328<br>[1.726,3.140] | (<0.0001) | 1.008<br>[0.837,1.213] | (0.9350)  |
| 13 | 5.102<br>[2.859,9.107]   | (<0.0001) | 2.991<br>[2.219,4.032] | (<0.0001) | 1.140<br>[0.948,1.371] | (0.1626)  |
| 14 | 6.025<br>[3.382,10.732]  | (<0.0001) | 3.691<br>[2.772,4.914] | (<0.0001) | 1.298<br>[1.080,1.559] | (0.0053)  |
| 15 | 6.371<br>[3.625,11.195]  | (<0.0001) | 3.854<br>[2.870,5.175] | (<0.0001) | 1.530<br>[1.271,1.843] | (<0.0001) |
| 16 | 6.448<br>[3.679,11.302]  | (<0.0001) | 4.302<br>[3.185,5.812] | (<0.0001) | 1.592<br>[1.329,1.907] | (<0.0001) |
| 17 | 6.504<br>[3.670,11.524]  | (<0.0001) | 4.402<br>[3.273,5.920] | (<0.0001) | 1.780<br>[1.484,2.135] | (<0.0001) |
| 18 | 9.029<br>[5.071,16.076]  | (<0.0001) | 4.882<br>[3.638,6.553] | (<0.0001) | 1.705<br>[1.410,2.062] | (<0.0001) |
| 19 | 7.690<br>[4.384,13.491]  | (<0.0001) | 4.751<br>[3.537,6.382] | (<0.0001) | 2.089<br>[1.734,2.518] | (<0.0001) |
| 20 | 9.230<br>[5.263,16.188]  | (<0.0001) | 5.183<br>[3.861,6.959] | (<0.0001) | 1.910<br>[1.587,2.298] | (<0.0001) |
| 21 | 12.352<br>[6.730,22.671] | (<0.0001) | 5.503<br>[4.090,7.405] | (<0.0001) | 1.734<br>[1.439,2.089] | (<0.0001) |
| 22 | 11.608<br>[6.535,20.619] | (<0.0001) | 6.361<br>[4.728,8.558] | (<0.0001) | 1.938<br>[1.614,2.328] | (<0.0001) |
| 23 | 8.406<br>[4.709,15.004]  | (<0.0001) | 5.762<br>[4.274,7.767] | (<0.0001) | 1.890<br>[1.570,2.276] | (<0.0001) |

|    |                          |           |                        |           |                        |           |
|----|--------------------------|-----------|------------------------|-----------|------------------------|-----------|
| 24 | 10.027<br>[5.652,17.788] | (<0.0001) | 4.709<br>[3.498,6.338] | (<0.0001) | 1.403<br>[1.167,1.686] | (0.0003)  |
| 25 | 7.763<br>[4.428,13.611]  | (<0.0001) | 3.674<br>[2.738,4.931] | (<0.0001) | 1.465<br>[1.222,1.757] | (<0.0001) |
| 26 | 7.663<br>[4.331,13.560]  | (<0.0001) | 4.263<br>[3.167,5.739] | (<0.0001) | 1.368<br>[1.140,1.642] | (0.0007)  |

|    |                          |           |                        |           |                        |           |
|----|--------------------------|-----------|------------------------|-----------|------------------------|-----------|
| 27 | 7.980<br>[4.497,14.162]  | (<0.0001) | 3.924<br>[2.916,5.282] | (<0.0001) | 1.364<br>[1.130,1.647] | (0.0012)  |
| 28 | 6.591<br>[3.750,11.585]  | (<0.0001) | 4.601<br>[3.426,6.179] | (<0.0001) | 1.466<br>[1.225,1.756] | (<0.0001) |
| 29 | 6.787<br>[3.872,11.894]  | (<0.0001) | 4.377<br>[3.245,5.904] | (<0.0001) | 1.496<br>[1.248,1.792] | (<0.0001) |
| 30 | 6.650<br>[3.817,11.588]  | (<0.0001) | 4.541<br>[3.331,6.191] | (<0.0001) | 1.570<br>[1.308,1.885] | (<0.0001) |
| 31 | 9.981<br>[5.626,17.705]  | (<0.0001) | 4.128<br>[3.075,5.543] | (<0.0001) | 1.514<br>[1.256,1.825] | (<0.0001) |
| 32 | 9.847<br>[5.566,17.420]  | (<0.0001) | 4.339<br>[3.226,5.837] | (<0.0001) | 1.717<br>[1.422,2.072] | (<0.0001) |
| 33 | 8.955<br>[5.053,15.868]  | (<0.0001) | 4.544<br>[3.381,6.109] | (<0.0001) | 1.602<br>[1.332,1.927] | (<0.0001) |
| 34 | 10.674<br>[6.045,18.849] | (<0.0001) | 5.099<br>[3.793,6.856] | (<0.0001) | 1.859<br>[1.549,2.232] | (<0.0001) |
| 35 | 10.986<br>[6.168,19.569] | (<0.0001) | 5.218<br>[3.883,7.012] | (<0.0001) | 1.732<br>[1.440,2.084] | (<0.0001) |
| 36 | 8.424<br>[4.790,14.816]  | (<0.0001) | 4.767<br>[3.550,6.401] | (<0.0001) | 1.524<br>[1.272,1.827] | (<0.0001) |
| 37 | 6.663<br>[3.715,11.952]  | (<0.0001) | 4.661<br>[3.466,6.270] | (<0.0001) | 1.514<br>[1.261,1.819] | (<0.0001) |
| 38 | 8.029<br>[4.567,14.116]  | (<0.0001) | 4.476<br>[3.335,6.007] | (<0.0001) | 1.546<br>[1.290,1.854] | (<0.0001) |
| 39 | 7.017<br>[3.969,12.405]  | (<0.0001) | 4.319<br>[3.201,5.828] | (<0.0001) | 1.524<br>[1.270,1.829] | (<0.0001) |
| 40 | 5.991<br>[3.418,10.503]  | (<0.0001) | 4.356<br>[3.240,5.856] | (<0.0001) | 1.517<br>[1.263,1.822] | (<0.0001) |
| 41 | 6.975<br>[3.930,12.380]  | (<0.0001) | 4.613<br>[3.437,6.191] | (<0.0001) | 1.670<br>[1.392,2.003] | (<0.0001) |
| 42 | 7.658<br>[4.397,13.338]  | (<0.0001) | 4.097<br>[3.051,5.501] | (<0.0001) | 1.626<br>[1.343,1.969] | (<0.0001) |
| 43 | 7.106<br>[3.990,12.656]  | (<0.0001) | 4.426<br>[3.298,5.938] | (<0.0001) | 1.581<br>[1.318,1.896] | (<0.0001) |
| 44 | 8.261<br>[4.659,14.650]  | (<0.0001) | 4.361<br>[3.250,5.852] | (<0.0001) | 1.567<br>[1.304,1.884] | (<0.0001) |
| 45 | 8.671<br>[4.912,15.305]  | (<0.0001) | 4.532<br>[3.376,6.084] | (<0.0001) | 1.367<br>[1.140,1.642] | (<0.0001) |

|    |                         |           |                        |           |                        |           |
|----|-------------------------|-----------|------------------------|-----------|------------------------|-----------|
| 46 | 9.704<br>[5.484,17.172] | (<0.0001) | 4.485<br>[3.343,6.016] | (<0.0001) | 1.704<br>[1.411,2.057] | (<0.0001) |
|----|-------------------------|-----------|------------------------|-----------|------------------------|-----------|

|                              |                          |           |                        |           |                        |           |
|------------------------------|--------------------------|-----------|------------------------|-----------|------------------------|-----------|
| 47                           | 9.669<br>[5.428,17.226]  | (<0.0001) | 4.522<br>[3.356,6.093] | (<0.0001) | 1.592<br>[1.325,1.914] | (<0.0001) |
| 48                           | 10.331<br>[5.882,18.146] | (<0.0001) | 4.208<br>[3.132,5.653] | (<0.0001) | 1.509<br>[1.231,1.850] | (0.0001)  |
| 49                           | 6.378<br>[3.615,11.253]  | (<0.0001) | 3.790<br>[2.798,5.136] | (<0.0001) | 1.285<br>[1.072,1.541] | (0.0067)  |
| 50                           | 5.286<br>[2.972,9.403]   | (<0.0001) | 4.010<br>[2.980,5.397] | (<0.0001) | 1.157<br>[0.964,1.389] | (0.1175)  |
| 51                           | 6.000<br>[3.436,10.477]  | (<0.0001) | 3.704<br>[2.739,5.009] | (<0.0001) | 1.219<br>[1.014,1.465] | (0.0349)  |
| 52                           | 5.936<br>[3.368,10.462]  | (<0.0001) | 3.762<br>[2.801,5.051] | (<0.0001) | 1.234<br>[1.023,1.489] | (0.0284)  |
| 53                           | 6.630<br>[3.737,11.763]  | (<0.0001) | 3.690<br>[2.736,4.977] | (<0.0001) | 1.334<br>[1.111,1.603] | (0.0020)  |
| 54                           | 5.335<br>[3.006,9.469]   | (<0.0001) | 3.785<br>[2.817,5.087] | (<0.0001) | 1.256<br>[1.047,1.506] | (0.0138)  |
| 55                           | 6.233<br>[3.511,11.065]  | (<0.0001) | 3.297<br>[2.451,4.434] | (<0.0001) | 1.410<br>[1.175,1.691] | (0.0002)  |
| 56                           | 6.996<br>[3.925,12.469]  | (<0.0001) | 3.385<br>[2.522,4.543] | (<0.0001) | 1.407<br>[1.172,1.690] | (0.0002)  |
| 57                           | 7.114<br>[4.064,12.455]  | (<0.0001) | 4.108<br>[3.049,5.534] | (<0.0001) | 1.469<br>[1.217,1.773] | (0.0001)  |
| 58                           | 7.070<br>[4.035,12.388]  | (<0.0001) | 3.940<br>[2.930,5.298] | (<0.0001) | 1.413<br>[1.174,1.701] | (0.0003)  |
| 59                           | 9.077<br>[5.145,16.012]  | (<0.0001) | 4.817<br>[3.574,6.493] | (<0.0001) | 1.464<br>[1.204,1.780] | (0.0001)  |
|                              |                          |           |                        |           |                        |           |
| <b>Birth Order</b>           |                          |           |                        |           |                        |           |
| Birth order of child is 1    | Ref                      | Ref       | Ref                    | Ref       | Ref                    | Ref       |
| Birth order of child is 2    | 1.124<br>[1.044,1.210]   | (0.0020)  | 1.104<br>[1.067,1.143] | (<0.0001) | 1.100<br>[1.064,1.137] | (<0.0001) |
| Birth order of child is >= 3 | 1.081<br>[0.989,1.182]   | (0.0852)  | 1.169<br>[1.121,1.220] | (<0.0001) | 1.190<br>[1.141,1.241] | (<0.0001) |



|                                               |                        |           |                        |           |                        |           |
|-----------------------------------------------|------------------------|-----------|------------------------|-----------|------------------------|-----------|
| <b>ICDS Utilisation in the last 12 months</b> |                        |           |                        |           |                        |           |
| No ICDS utilisation                           | Ref                    | Ref       | Ref                    | Ref       | Ref                    | Ref       |
| ICDS utilisation                              | 1.022<br>[0.952,1.097] | (0.5545)  | 1.087<br>[1.056,1.120] | (<0.0001) | 1.040<br>[1.006,1.075] | (0.0193)  |
|                                               |                        |           |                        |           |                        |           |
| <b>Private Institutional Delivery</b>         |                        |           |                        |           |                        |           |
| No                                            | Ref                    | Ref       | Ref                    | Ref       | Ref                    | Ref       |
| Yes                                           | 0.937<br>[0.855,1.028] | (0.1712)  | 0.890<br>[0.856,0.925] | (<0.0001) | 0.876<br>[0.843,0.911] | (<0.0001) |
|                                               |                        |           |                        |           |                        |           |
| <b>Skilled attendants at birth</b>            |                        |           |                        |           |                        |           |
| No                                            | Ref                    | Ref       | Ref                    | Ref       | Ref                    | Ref       |
| Yes                                           | 0.871<br>[0.806,0.942] | (0.0005)  | 0.933<br>[0.902,0.965] | (0.0001)  | 0.938<br>[0.899,0.978] | (0.0028)  |
|                                               |                        |           |                        |           |                        |           |
| <b>Mother's BMI</b>                           |                        |           |                        |           |                        |           |
| High BMI                                      | Ref                    | Ref       | Ref                    | Ref       | Ref                    | Ref       |
| Low BMI                                       | 1.191<br>[1.117,1.268] | (<0.0001) | 1.291<br>[1.251,1.332] | (<0.0001) | 1.372<br>[1.326,1.420] | (<0.0001) |
|                                               |                        |           |                        |           |                        |           |
| <b>Mother's Age (in years)</b>                |                        |           |                        |           |                        |           |
| Mothers' Age < 18                             | Ref                    | Ref       | Ref                    | Ref       | Ref                    | Ref       |
| Mothers' Age b/w 18-30                        | 0.690<br>[0.516,0.922] | (0.0122)  | 1.391<br>[1.019,1.898] | (0.0376)  | 0.937<br>[0.699,1.255] | (0.6616)  |
| Mothers' Age > 30                             | 0.684<br>[0.502,0.933] | (0.0163)  | 1.314<br>[0.960,1.798] | (0.0878)  | 0.853<br>[0.634,1.149] | (0.2964)  |
|                                               |                        |           |                        |           |                        |           |
| <b>Mother's Media Exposure</b>                |                        |           |                        |           |                        |           |
| Read no news                                  | Ref                    | Ref       | Ref                    | Ref       | Ref                    | Ref       |
| Read news weekly                              | 0.869<br>[0.783,0.964] | (0.0079)  | 0.957<br>[0.910,1.006] | (0.0818)  | 0.995<br>[0.940,1.053] | (0.8573)  |
|                                               |                        |           |                        |           |                        |           |
| <b>Mother's Height (in cm)</b>                |                        |           |                        |           |                        |           |
| Mother's Height                               | 0.934<br>[0.928,0.939] | (<0.0001) | 0.936<br>[0.933,0.938] | (<0.0001) | 0.940<br>[0.938,0.943] | (<0.0001) |

|                       |     |     |     |     |     |     |
|-----------------------|-----|-----|-----|-----|-----|-----|
|                       |     |     |     |     |     |     |
| <b>Fuel Sources</b>   |     |     |     |     |     |     |
| Absence of Clean Fuel | Ref | Ref | Ref | Ref | Ref | Ref |

|                                     |                        |           |                        |           |                        |           |
|-------------------------------------|------------------------|-----------|------------------------|-----------|------------------------|-----------|
| Clean Fuel Sources                  | 1.052<br>[0.925,1.195] | (0.4410)  | 0.993<br>[0.942,1.047] | (0.7859)  | 0.998<br>[0.961,1.037] | (0.9308)  |
|                                     |                        |           |                        |           |                        |           |
| <b>State/UTs</b>                    |                        |           |                        |           |                        |           |
| Andhra Pradesh (includes Telengana) | Ref                    | Ref       | Ref                    | Ref       | Ref                    | Ref       |
| Arunachal Pradesh                   | 0.692<br>[0.535,0.896] | (0.0052)  | 0.742<br>[0.637,0.865] | (0.0001)  | 0.658<br>[0.574,0.754] | (<0.0001) |
| Assam                               | 0.863<br>[0.685,1.087] | (0.2101)  | 0.923<br>[0.825,1.034] | (0.1664)  | 0.806<br>[0.726,0.894] | (<0.0001) |
| Bihar                               | 1.161<br>[0.952,1.415] | (0.1402)  | 1.250<br>[1.136,1.375] | (<0.0001) | 0.922<br>[0.848,1.003] | (0.0573)  |
| Chhattisgarh                        | 1.306<br>[1.076,1.585] | (0.0069)  | 1.094<br>[0.976,1.227] | (0.1234)  | 0.863<br>[0.778,0.957] | (0.0053)  |
| Goa                                 | 0.805<br>[0.622,1.043] | (0.1008)  | 0.840<br>[0.610,1.156] | (0.2837)  | 1.128<br>[0.830,1.534] | (0.4407)  |
| Gujarat                             | 1.876<br>[1.539,2.287] | (<0.0001) | 1.491<br>[1.334,1.665] | (<0.0001) | 1.304<br>[1.184,1.437] | (<0.0001) |
| Haryana                             | 1.627<br>[1.332,1.987] | (<0.0001) | 1.535<br>[1.364,1.727] | (<0.0001) | 0.939<br>[0.851,1.037] | (0.2143)  |
| Himachal Pradesh                    | 1.203<br>[0.963,1.503] | (0.1041)  | 1.086<br>[0.921,1.281] | (0.3268)  | 1.169<br>[1.004,1.360] | (0.0439)  |
| Jammu and Kashmir (includes Ladakh) | 0.822<br>[0.636,1.062] | (0.1339)  | 1.095<br>[0.962,1.248] | (0.1705)  | 0.957<br>[0.835,1.098] | (0.5317)  |
| Jharkhand                           | 0.796<br>[0.654,0.969] | (0.0227)  | 1.157<br>[1.045,1.280] | (0.0049)  | 0.836<br>[0.760,0.920] | (0.0003)  |
| Karnataka                           | 1.187<br>[0.980,1.438] | (0.0795)  | 1.392<br>[1.237,1.567] | (<0.0001) | 1.125<br>[1.017,1.245] | (0.0222)  |
| Kerala                              | 0.855<br>[0.664,1.100] | (0.2228)  | 1.017<br>[0.862,1.199] | (0.8438)  | 1.049<br>[0.907,1.214] | (0.5187)  |
| Madhya Pradesh                      | 1.147<br>[0.958,1.374] | (0.1350)  | 1.294<br>[1.177,1.424] | (<0.0001) | 0.927<br>[0.849,1.012] | (0.0888)  |
| Maharashtra                         | 1.426<br>[1.173,1.733] | (0.0004)  | 1.247<br>[1.112,1.399] | (0.0002)  | 1.167<br>[1.058,1.288] | (0.0021)  |
| Manipur                             | 0.807<br>[0.651,1.002] | (0.0520)  | 1.003<br>[0.879,1.145] | (0.9653)  | 0.612<br>[0.526,0.712] | (<0.0001) |
| Meghalaya                           | 1.062<br>[0.755,1.494] | (0.7294)  | 1.281<br>[1.083,1.514] | (0.0038)  | 1.152<br>[0.974,1.363] | (0.0980)  |
| Mizoram                             | 0.768<br>[0.536,1.100] | (0.1491)  | 0.976<br>[0.807,1.180] | (0.8023)  | 0.871<br>[0.715,1.062] | (0.1723)  |
| Nagaland                            | 0.629<br>[0.473,0.837] | (0.0015)  | 0.890<br>[0.752,1.054] | (0.1766)  | 0.996<br>[0.819,1.213] | (0.9719)  |
| Delhi                               | 1.844<br>[1.438,2.365] | (<0.0001) | 1.215<br>[0.975,1.515] | (0.0828)  | 1.072<br>[0.939,1.225] | (0.3047)  |
| Odisha                              | 0.869<br>[0.702,1.075] | (0.1965)  | 0.818<br>[0.736,0.909] | (0.0002)  | 0.681<br>[0.618,0.750] | (<0.0001) |

|               |                        |           |                        |           |                        |          |
|---------------|------------------------|-----------|------------------------|-----------|------------------------|----------|
| Punjab        | 1.202<br>[0.950,1.522] | (0.1248)  | 1.196<br>[1.012,1.412] | (0.0352)  | 0.896<br>[0.786,1.022] | (0.1032) |
| Rajasthan     | 1.113<br>[0.921,1.345] | (0.2665)  | 1.442<br>[1.309,1.589] | (<0.0001) | 0.995<br>[0.905,1.095] | (0.9248) |
| Sikkim        | 0.759<br>[0.565,1.021] | (0.0682)  | 1.092<br>[0.881,1.354] | (0.4227)  | 0.602<br>[0.420,0.864] | (0.0058) |
| Tamil Nadu    | 0.738<br>[0.600,0.908] | (0.0041)  | 0.984<br>[0.875,1.106] | (0.7849)  | 0.848<br>[0.765,0.941] | (0.0018) |
| Tripura       | 0.618<br>[0.473,0.806] | (0.0004)  | 0.526<br>[0.434,0.638] | (<0.0001) | 0.767<br>[0.656,0.897] | (0.0009) |
| Uttar Pradesh | 1.413<br>[1.204,1.659] | (<0.0001) | 1.434<br>[1.308,1.571] | (<0.0001) | 1.023<br>[0.946,1.107] | (0.5673) |
| Uttarakhand   | 1.374<br>[1.103,1.711] | (0.0046)  | 1.203<br>[1.064,1.360] | (0.0032)  | 0.801<br>[0.699,0.918] | (0.0015) |
| West Bengal   | 0.804<br>[0.658,0.982] | (0.0327)  | 0.806<br>[0.711,0.913] | (0.0007)  | 0.792<br>[0.704,0.891] | (0.0001) |
| N             | 38996                  |           | 21172 8                |           | 192314                 |          |
| chi2          | 3273.943               |           | 10115.2 08             |           | 7119.7 03              |          |

Table S3. Results for the Poisson regression analysis with all the included covariates

|                                  | NFHS-3 (2005-2006)        |           | NFHS-4 (2015-2016)        |           | NFHS-5 (2019-2021)        |           |
|----------------------------------|---------------------------|-----------|---------------------------|-----------|---------------------------|-----------|
|                                  | Coefficient<br>[95% CI]   | P-values  | Coefficient<br>[95% CI]   | P-values  | Coefficient<br>[95% CI]   | P-values  |
| <b>Wealth Quintile</b>           |                           |           |                           |           |                           |           |
| Poorest                          | Ref                       | Ref       | Ref                       | Ref       | Ref                       | Ref       |
| Poorer                           | -0.109<br>[-0.149,-0.070] | (<0.0001) | -0.039<br>[-0.058,-0.021] | (<0.0001) | -0.035<br>[-0.057,-0.012] | (0.0023)  |
| Middle                           | -0.190<br>[-0.251,-0.129] | (<0.0001) | -0.108<br>[-0.135,-0.080] | (<0.0001) | -0.091<br>[-0.118,-0.064] | (<0.0001) |
| Richer                           | -0.379<br>[-0.472,-0.286] | (<0.0001) | -0.207<br>[-0.250,-0.164] | (<0.0001) | -0.201<br>[-0.236,-0.166] | (<0.0001) |
| Richest                          | -0.605<br>[-0.735,-0.476] | (<0.0001) | -0.312<br>[-0.369,-0.255] | (<0.0001) | -0.286<br>[-0.335,-0.237] | (<0.0001) |
|                                  |                           |           |                           |           |                           |           |
| <b>Marginalised Social Group</b> |                           |           |                           |           |                           |           |
| Unreserved category              | Ref                       | Ref       | Ref                       | Ref       | Ref                       | Ref       |
| SC                               | 0.069<br>[0.024,0.114]    | (0.0029)  | 0.111<br>[0.083,0.140]    | (<0.0001) | 0.128<br>[0.095,0.161]    | (<0.0001) |
| ST                               | 0.063<br>[0.006,0.119]    | (0.0289)  | 0.092<br>[0.059,0.125]    | (<0.0001) | 0.119<br>[0.080,0.158]    | (<0.0001) |
| OBC                              | 0.031<br>[-0.010,0.073]   | (0.1384)  | 0.066<br>[0.041,0.091]    | (<0.0001) | 0.076<br>[0.045,0.107]    | (<0.0001) |
|                                  |                           |           |                           |           |                           |           |
| <b>Religion</b>                  |                           |           |                           |           |                           |           |
| Hindu                            | Ref                       | Ref       | Ref                       | Ref       | Ref                       | Ref       |
| Muslim                           | 0.066<br>[0.020,0.112]    | (0.0053)  | 0.083<br>[0.059,0.107]    | (<0.0001) | 0.094<br>[0.064,0.124]    | (<0.0001) |
| Christian                        | 0.119<br>[0.013,0.226]    | (0.0285)  | -0.043<br>[-0.118,0.031]  | (0.2557)  | -0.027<br>[-0.110,0.056]  | (0.5271)  |
| Other Religion                   | 0.073<br>[-0.013,0.159]   | (0.0971)  | 0.026<br>[-0.051,0.103]   | (0.5078)  | -0.012<br>[-0.083,0.058]  | (0.7365)  |
|                                  |                           |           |                           |           |                           |           |
| <b>Residence</b>                 |                           |           |                           |           |                           |           |
| Rural                            | Ref                       | Ref       | Ref                       | Ref       | Ref                       | Ref       |
| Urban                            | 0.081<br>[0.039,0.124]    | (0.0002)  | 0.025<br>[-0.000,0.051]   | (0.0525)  | 0.010<br>[-0.018,0.039]   | (0.4775)  |
|                                  |                           |           |                           |           |                           |           |
| <b>Maternal Education</b>        |                           |           |                           |           |                           |           |
| Illiterate                       | Ref                       | Ref       | Ref                       | Ref       | Ref                       | Ref       |
| Primary                          | -0.048<br>[-0.086,-0.010] | (0.0144)  | -0.044<br>[-0.065,-0.022] | (0.0001)  | -0.036<br>[-0.062,-0.011] | (0.0047)  |
| Secondary                        | -0.096<br>[-0.136,-0.056] | (<0.0001) | -0.128                    | (<0.0001) | -0.110                    | (<0.0001) |

|                                             |                           |               |                           |               |                           |               |
|---------------------------------------------|---------------------------|---------------|---------------------------|---------------|---------------------------|---------------|
|                                             |                           |               | [-0.148,-0.108]           |               | [-0.132,-0.088]           |               |
| Higher                                      | -0.307<br>[-0.427,-0.187] | (<0.0001<br>) | -0.287<br>[-0.336,-0.239] | (<0.0001<br>) | -0.235<br>[-0.275,-0.195] | (<0.0001<br>) |
| <b>Sex of the Child</b>                     |                           |               |                           |               |                           |               |
| Female                                      | Ref                       | Ref           | Ref                       | Ref           | Ref                       | Ref           |
| Male                                        | 0.001<br>[-0.023,0.025]   | (0.9304)      | 0.036<br>[0.021,0.050]    | (<0.0001<br>) | 0.045<br>[0.029,0.061]    | (<0.0001<br>) |
| <b>Age of the Child (6 month intervals)</b> |                           |               |                           |               |                           |               |
| 0-6                                         | Ref                       | Ref           | Ref                       | Ref           | Ref                       | Ref           |
| 6-12                                        | 0.379<br>[0.272,0.487]    | (<0.0001<br>) | 0.140<br>[0.086,0.193]    | (<0.0001<br>) | 0.014<br>[-0.037,0.064]   | (0.5947)      |
| 12-18                                       | 0.878<br>[0.777,0.979]    | (<0.0001<br>) | 0.652<br>[0.603,0.701]    | (<0.0001<br>) | 0.402<br>[0.357,0.446]    | (<0.0001<br>) |
| 18-24                                       | 1.093<br>[0.992,1.193]    | (<0.0001<br>) | 0.864<br>[0.817,0.911]    | (<0.0001<br>) | 0.579<br>[0.536,0.622]    | (<0.0001<br>) |
| 24-30                                       | 1.011<br>[0.911,1.112]    | (<0.0001<br>) | 0.749<br>[0.701,0.797]    | (<0.0001<br>) | 0.430<br>[0.385,0.474]    | (<0.0001<br>) |
| 30-36                                       | 1.084<br>[0.984,1.183]    | (<0.0001<br>) | 0.792<br>[0.743,0.840]    | (<0.0001<br>) | 0.517<br>[0.472,0.561]    | (<0.0001<br>) |
| 36-42                                       | 0.982<br>[0.883,1.081]    | (<0.0001<br>) | 0.783<br>[0.735,0.831]    | (<0.0001<br>) | 0.474<br>[0.429,0.519]    | (<0.0001<br>) |
| 42-48                                       | 1.047<br>[0.949,1.145]    | (<0.0001<br>) | 0.768<br>[0.721,0.816]    | (<0.0001<br>) | 0.499<br>[0.454,0.544]    | (<0.0001<br>) |
| 48-54                                       | 0.939<br>[0.838,1.041]    | (<0.0001<br>) | 0.698<br>[0.649,0.748]    | (<0.0001<br>) | 0.367<br>[0.319,0.415]    | (<0.0001<br>) |
| 54-60                                       | 0.960<br>[0.858,1.063]    | (<0.0001<br>) | 0.698<br>[0.650,0.747]    | (<0.0001<br>) | 0.417<br>[0.372,0.463]    | (<0.0001<br>) |
| <b>Birth Order</b>                          |                           |               |                           |               |                           |               |
| Birth order of child is 1                   | Ref                       | Ref           | Ref                       | Ref           | Ref                       | Ref           |
| Birth order of child is 2                   | 0.059<br>[0.024,0.093]    | (0.0010)      | 0.056<br>[0.036,0.075]    | (<0.0001<br>) | 0.057<br>[0.037,0.077]    | (<0.0001<br>) |
| Birth order of child is >= 3                | 0.035<br>[-0.004,0.074]   | (0.0800)      | 0.083<br>[0.060,0.105]    | (<0.0001)     | 0.099<br>[0.075,0.123]    | (<0.0001)     |
| <b>ICDS Utilization in the last 12</b>      |                           |               |                           |               |                           |               |
| No ICDS utilization                         | Ref                       | Ref           | Ref                       | Ref           | Ref                       | Ref           |
| ICDS utilization                            | 0.010<br>[-0.020,0.041]   | (0.5053)      | 0.049<br>[0.033,0.065]    | (<0.0001)     | 0.020<br>[0.001,0.040]    | (0.0425)      |
| <b>Private Institutional Delivery</b>       |                           |               |                           |               |                           |               |

|                                     |                           |           |                           |           |                           |           |
|-------------------------------------|---------------------------|-----------|---------------------------|-----------|---------------------------|-----------|
| No                                  | Ref                       | Ref       | Ref                       | Ref       | Ref                       | Ref       |
| Yes                                 | -0.040<br>[-0.087,0.007]  | (0.0961)  | -0.073<br>[-0.096,-0.049] | (<0.0001) | -0.086<br>[-0.111,-0.062] | (<0.0001) |
| <b>Skilled attendants at birth</b>  |                           |           |                           |           |                           |           |
| No                                  | Ref                       | Ref       | Ref                       | Ref       | Ref                       | Ref       |
| Yes                                 | -0.059<br>[-0.093,-0.024] | (0.0009)  | -0.030<br>[-0.046,-0.014] | (0.0003)  | -0.032<br>[-0.054,-0.010] | (0.0051)  |
| <b>Mother's BMI</b>                 |                           |           |                           |           |                           |           |
| High BMI                            | Ref                       | Ref       | Ref                       | Ref       | Ref                       | Ref       |
| Low BMI                             | 0.077<br>[0.050,0.104]    | (<0.0001) | 0.130<br>[0.114,0.146]    | (<0.0001) | 0.174<br>[0.155,0.192]    | (<0.0001) |
| <b>Mother's Age (in years)</b>      |                           |           |                           |           |                           |           |
| Mothers' Age < 18                   | Ref                       | Ref       | Ref                       | Ref       | Ref                       | Ref       |
| Mothers' Age b/w 18-30              | -0.183<br>[-0.307,-0.060] | (0.0037)  | 0.209<br>[0.004,0.415]    | (0.0458)  | -0.053<br>[-0.233,0.128]  | (0.5679)  |
| Mothers' Age > 30                   | -0.181<br>[-0.312,-0.049] | (0.0071)  | 0.177<br>[-0.030,0.383]   | (0.0935)  | -0.107<br>[-0.291,0.077]  | (0.2539)  |
| <b>Mother's Media Exposure</b>      |                           |           |                           |           |                           |           |
| Read no news                        | Ref                       | Ref       | Ref                       | Ref       | Ref                       | Ref       |
| Read news weekly                    | -0.085<br>[-0.144,-0.026] | (0.0049)  | -0.040<br>[-0.072,-0.008] | (0.0149)  | -0.010<br>[-0.048,0.029]  | (0.6254)  |
| <b>Mother's Height (cm)</b>         |                           |           |                           |           |                           |           |
| Mother's Height                     | -0.030<br>[-0.032,-0.028] | (<0.0001) | -0.034<br>[-0.035,-0.032] | (<0.0001) | -0.034<br>[-0.035,-0.033] | (<0.0001) |
| <b>State/UTs</b>                    |                           |           |                           |           |                           |           |
| Andhra Pradesh (includes Telengana) | Ref                       | Ref       | Ref                       | Ref       | Ref                       | Ref       |
| Arunachal Pradesh                   | -0.162<br>[-0.288,-0.035] | (0.0123)  | -0.161<br>[-0.259,-0.063] | (0.0013)  | -0.262<br>[-0.351,-0.173] | (<0.0001) |

|                                     |                           |           |                           |           |                           |           |
|-------------------------------------|---------------------------|-----------|---------------------------|-----------|---------------------------|-----------|
| Assam                               | -0.060<br>[-0.174,0.054]  | (0.2987)  | -0.027<br>[-0.097,0.043]  | (0.4452)  | -0.130<br>[-0.195,-0.065] | (0.0001)  |
| Bihar                               | 0.064<br>[-0.024,0.153]   | (0.1533)  | 0.130<br>[0.072,0.188]    | (<0.0001) | -0.052<br>[-0.103,-0.002] | (0.0426)  |
| Chhattisgarh                        | 0.119<br>[0.032,0.205]    | (0.0071)  | 0.066<br>[-0.003,0.135]   | (0.0597)  | -0.088<br>[-0.152,-0.025] | (0.0066)  |
| Goa                                 | -0.166<br>[-0.324,-0.008] | (0.0400)  | -0.136<br>[-0.362,0.089]  | (0.2365)  | 0.082<br>[-0.131,0.295]   | (0.4502)  |
| Gujarat                             | 0.287<br>[0.198,0.376]    | (<0.0001) | 0.234<br>[0.167,0.301]    | (<0.0001) | 0.152<br>[0.094,0.209]    | (<0.0001) |
| Haryana                             | 0.224<br>[0.130,0.319]    | (<0.0001) | 0.242<br>[0.169,0.314]    | (<0.0001) | -0.056<br>[-0.120,0.008]  | (0.0858)  |
| Himachal Pradesh                    | 0.081<br>[-0.034,0.197]   | (0.1683)  | 0.030<br>[-0.079,0.139]   | (0.5917)  | 0.090<br>[-0.006,0.185]   | (0.0672)  |
| Jammu and Kashmir (includes Ladakh) | -0.103<br>[-0.239,0.034]  | (0.1397)  | 0.043<br>[-0.039,0.124]   | (0.3033)  | -0.058<br>[-0.148,0.032]  | (0.2057)  |
| Jharkhand                           | -0.084<br>[-0.177,0.009]  | (0.0761)  | 0.096<br>[0.035,0.156]    | (0.0019)  | -0.103<br>[-0.160,-0.046] | (0.0004)  |
| Karnataka                           | 0.078<br>[-0.015,0.172]   | (0.1006)  | 0.193<br>[0.122,0.263]    | (<0.0001) | 0.066<br>[0.004,0.128]    | (0.0369)  |
| Kerala                              | -0.144<br>[-0.298,0.011]  | (0.0686)  | -0.044<br>[-0.163,0.074]  | (0.4658)  | 0.002<br>[-0.100,0.105]   | (0.9643)  |
| Madhya Pradesh                      | 0.073<br>[-0.012,0.157]   | (0.0935)  | 0.153<br>[0.095,0.212]    | (<0.0001) | -0.050<br>[-0.104,0.004]  | (0.0674)  |
| Maharashtra                         | 0.175<br>[0.082,0.268]    | (0.0002)  | 0.141<br>[0.070,0.212]    | (0.0001)  | 0.094<br>[0.034,0.155]    | (0.0023)  |
| Manipur                             | -0.114<br>[-0.226,-0.002] | (0.0454)  | 0.001<br>[-0.083,0.086]   | (0.9782)  | -0.330<br>[-0.435,-0.225] | (<0.0001) |
| Meghalaya                           | 0.037<br>[-0.111,0.186]   | (0.6221)  | 0.171<br>[0.075,0.267]    | (0.0005)  | 0.077<br>[-0.021,0.174]   | (0.1244)  |
| Mizoram                             | -0.120<br>[-0.301,0.062]  | (0.1969)  | -0.012<br>[-0.134,0.110]  | (0.8496)  | -0.093<br>[-0.222,0.036]  | (0.1574)  |
| Nagaland                            | -0.216<br>[-0.360,-0.073] | (0.0032)  | -0.064<br>[-0.171,0.043]  | (0.2385)  | -0.012<br>[-0.136,0.112]  | (0.8464)  |
| Delhi                               | 0.287<br>[0.167,0.407]    | (<0.0001) | 0.125<br>[-0.012,0.261]   | (0.0731)  | 0.046<br>[-0.039,0.131]   | (0.2927)  |
| Odisha                              | -0.061<br>[-0.165,0.043]  | (0.2514)  | -0.097<br>[-0.162,-0.031] | (0.0037)  | -0.235<br>[-0.296,-0.173] | (<0.0001) |
| Punjab                              | 0.073<br>[-0.045,0.192]   | (0.2241)  | 0.085<br>[-0.021,0.192]   | (0.1168)  | -0.099<br>[-0.186,-0.013] | (0.0245)  |

|               |                           |          |                           |           |                           |          |
|---------------|---------------------------|----------|---------------------------|-----------|---------------------------|----------|
| Rajasthan     | 0.048<br>[-0.045,0.142]   | (0.3107) | 0.209<br>[0.150,0.269]    | (<0.0001) | -0.013<br>[-0.073,0.046]  | (0.6588) |
| Sikkim        | -0.130<br>[-0.287,0.027]  | (0.1038) | 0.040<br>[-0.101,0.180]   | (0.5800)  | -0.360<br>[-0.630,-0.091] | (0.0088) |
| Tamil Nadu    | -0.185<br>[-0.299,-0.070] | (0.0015) | -0.020<br>[-0.096,0.057]  | (0.6124)  | -0.125<br>[-0.194,-0.056] | (0.0004) |
| Tripura       | -0.242<br>[-0.386,-0.099] | (0.0009) | -0.400<br>[-0.534,-0.265] | (<0.0001) | -0.157<br>[-0.256,-0.058] | (0.0019) |
| Uttar Pradesh | 0.144<br>[0.069,0.220]    | (0.0002) | 0.203<br>[0.146,0.260]    | (<0.0001) | 0.011<br>[-0.038,0.059]   | (0.6646) |
| Uttarakhand   | 0.155<br>[0.051,0.259]    | (0.0035) | 0.113<br>[0.038,0.189]    | (0.0033)  | -0.161<br>[-0.256,-0.066] | (0.0009) |
| West Bengal   | -0.098<br>[-0.198,0.001]  | (0.0531) | -0.118<br>[-0.196,-0.040] | (0.0031)  | -0.139<br>[-0.213,-0.066] | (0.0002) |
| N             | 38996                     |          | 21172                     | 8         | 192314                    |          |
| chi2          | 3871.7                    | 67       | 11126.0                   | 82        | 8479.009                  |          |

Note - Coefficient values of the continuous covariates in the analysis report the expected increase or decrease in log count of stunted children in the sample with one unit increase in the covariates. And the coefficient values of an indicator variable report the expected difference in log count of the stunted children between the group attributes and their corresponding reference group.



Table S4. Results of the logistic regression for 64 intersecting subgroups of marginalised social group, household wealth, maternal education, and residence in NFHS-5

|                                              | NFHS-5 (2019-2021)                    |           |
|----------------------------------------------|---------------------------------------|-----------|
|                                              | Adjusted Odds Ratio (AOR)<br>[95% CI] | P-values  |
| <b>Intersectional Subgroups Considered</b>   |                                       |           |
| None of the Above, Tertiary, Non-poor, Urban | Ref                                   | Ref       |
| ST, No education, Poor, Urban                | 5.341<br>[3.134,9.104]                | (<0.0001) |
| ST, Primary, Poor, Urban                     | 2.694<br>[1.649,4.402]                | (<0.0001) |
| ST, Secondary, Poor, Urban                   | 3.272<br>[2.122,5.046]                | (<0.0001) |
| ST, Tertiary, Poor, Urban                    | 3.874<br>[1.541,9.738]                | (0.0040)  |
| ST, No education, Non-poor, Urban            | 3.476<br>[2.134,5.662]                | (<0.0001) |
| ST, Primary, Non-poor, Urban                 | 2.868<br>[1.922,4.278]                | (<0.0001) |
| ST, Secondary, Non-poor, Urban               | 1.455<br>[1.163,1.820]                | (0.0010)  |
| ST, Tertiary, Non-poor, Urban                | 0.897<br>[0.608,1.324]                | (0.5838)  |
| ST, No education, Poor, Rural                | 3.761<br>[3.263,4.335]                | (<0.0001) |
| ST, Primary, Poor, Rural                     | 3.298<br>[2.817,3.861]                | (<0.0001) |
| ST, Secondary, Poor, Rural                   | 2.817<br>[2.445,3.245]                | (<0.0001) |
| ST, Tertiary, Poor, Rural                    | 1.968<br>[1.431,2.705]                | (<0.0001) |
| ST, No education, Non-poor, Rural            | 2.831<br>[2.261,3.545]                | (<0.0001) |
| ST, Primary, Non-poor, Rural                 | 2.797<br>[2.245,3.484]                | (<0.0001) |
| ST, Secondary, Non-poor, Rural               | 2.287<br>[1.966,2.659]                | (<0.0001) |
| ST, Tertiary, Non-poor, Rural                | 1.708<br>[1.286,2.268]                | (0.0002)  |
| SC, No education, Poor, Urban                | 4.519<br>[3.361,6.076]                | (<0.0001) |
| SC, Primary, Poor, Urban                     | 3.381<br>[2.355,4.855]                | (<0.0001) |
| SC, Secondary, Poor, Urban                   | 3.264<br>[2.446,4.356]                | (<0.0001) |

|                                   |                        |           |
|-----------------------------------|------------------------|-----------|
| SC, Tertiary, Poor, Urban         | 0.960<br>[0.351,2.623] | (0.9366)  |
| SC, No education, Non-poor, Urban | 2.895<br>[2.273,3.689] | (<0.0001) |
| SC, Primary, Non-poor, Urban      | 2.560<br>[2.000,3.277] | (<0.0001) |
| SC, Secondary, Non-poor, Urban    | 2.030<br>[1.721,2.396] | (<0.0001) |
| SC, Tertiary, Non-poor, Urban     | 1.213<br>[0.984,1.497] | (0.0711)  |
| SC, No education, Poor, Rural     | 4.126<br>[3.588,4.744] | (<0.0001) |
| SC, Primary, Poor, Rural          | 3.762<br>[3.224,4.389] | (<0.0001) |
| SC, Secondary, Poor, Rural        | 3.023<br>[2.626,3.479] | (<0.0001) |
| SC, Tertiary, Poor, Rural         | 2.245<br>[1.761,2.862] | (<0.0001) |
| SC, No education, Non-poor, Rural | 2.924<br>[2.481,3.445] | (<0.0001) |
| SC, Primary, Non-poor, Rural      | 2.696<br>[2.273,3.197] | (<0.0001) |
| SC, Secondary, Non-poor, Rural    | 2.030<br>[1.769,2.329] | (<0.0001) |
| SC, Tertiary, Non-poor, Rural     | 1.457<br>[1.208,1.758] | (0.0001)  |
| OBC, No education, Poor, Urban    | 3.781<br>[2.768,5.167] | (<0.0001) |
| OBC, Primary, Poor, Urban         | 2.864<br>[1.933,4.243] | (<0.0001) |
| OBC, Secondary, Poor, Urban       | 2.618<br>[1.982,3.457] | (<0.0001) |
| OBC, Tertiary, Poor, Urban        | 1.836<br>[0.793,4.251] | (0.1562)  |
| OBC, No education, Nonpoor, Urban | 2.274<br>[1.851,2.794] | (<0.0001) |
| OBC, Primary, Non-poor, Urban     | 2.178<br>[1.792,2.646] | (<0.0001) |
| OBC, Secondary, Non-poor, Urban   | 1.733<br>[1.500,2.002] | (<0.0001) |
| OBC, Tertiary, Non-poor, Urban    | 1.123<br>[0.961,1.312] | (0.1436)  |
| OBC, No education, Poor, Rural    | 4.115<br>[3.593,4.714] | (<0.0001) |
| OBC, Primary, Poor, Rural         | 3.389<br>[2.924,3.929] | (<0.0001) |
| OBC, Secondary, Poor, Rural       | 2.585<br>[2.259,2.959] | (<0.0001) |
| OBC, Tertiary, Poor, Rural        | 1.880<br>[1.521,2.324] | (<0.0001) |

|                                                  |                         |           |
|--------------------------------------------------|-------------------------|-----------|
| OBC, No education, Nonpoor, Rural                | 2.857<br>[2.466,3.309]  | (<0.0001) |
| OBC, Primary, Non-poor, Rural                    | 2.300<br>[1.973,2.682]  | (<0.0001) |
| OBC, Secondary, Non-poor, Rural                  | 1.827<br>[1.602,2.083]  | (<0.0001) |
| OBC, Tertiary, Non-poor, Rural                   | 1.304<br>[1.118,1.520]  | (0.0007)  |
| None of the Above, No education, Poor, Urban     | 3.953<br>[2.254,6.933]  | (<0.0001) |
| None of the Above, Primary, Poor, Urban          | 5.758<br>[2.861,11.590] | (<0.0001) |
| None of the Above, Secondary, Poor, Urban        | 2.130<br>[1.218,3.724]  | (0.0080)  |
| None of the Above, Tertiary, Poor, Urban         | 3.411<br>[0.658,17.685] | (0.1439)  |
| None of the Above, No education, Non-poor, Urban | 2.740<br>[2.073,3.622]  | (<0.0001) |
| None of the Above, Primary, Non-poor, Urban      | 2.246<br>[1.648,3.061]  | (<0.0001) |
| None of the Above, Secondary, Non-poor, Urban    | 1.570<br>[1.330,1.854]  | (<0.0001) |
| None of the Above, No education, Poor, Rural     | 3.603<br>[3.042,4.269]  | (<0.0001) |
| None of the Above, Primary, Poor, Rural          | 2.747<br>[2.217,3.404]  | (<0.0001) |
| None of the Above, Secondary, Poor, Rural        | 2.213<br>[1.874,2.614]  | (<0.0001) |
| None of the Above, Tertiary, Poor, Rural         | 1.131<br>[0.780,1.638]  | (0.5163)  |
| None of the Above, No education, Non-poor, Rural | 2.282<br>[1.884,2.765]  | (<0.0001) |
| None of the Above, Primary, Non-poor, Rural      | 2.528<br>[2.058,3.104]  | (<0.0001) |
| None of the Above, Secondary, Non-poor, Rural    | 1.482<br>[1.288,1.705]  | (<0.0001) |
| None of the Above, Tertiary, Non-poor, Rural     | 0.946<br>[0.790,1.133]  | (0.5466)  |
| N                                                | 195802                  |           |
| Chi <sup>2</sup>                                 | 2932.319                |           |

Note - Economic position variable were aggregated/dichotomized such that they were recoded into poor and non-poor; poorest and poorer categories were combined into a single category “poor”, and the middle, richer and richest wealth quintiles were grouped into “non-poor”. Sample size differs due to the fewer predictor variables in this particular analysis.

Figure S1. Graph illustrating the Adjusted Odds Ratios of the 64 intersecting subgroups of household wealth, maternal education, urban/rural residence, and marginalised social groups in NFHS-5

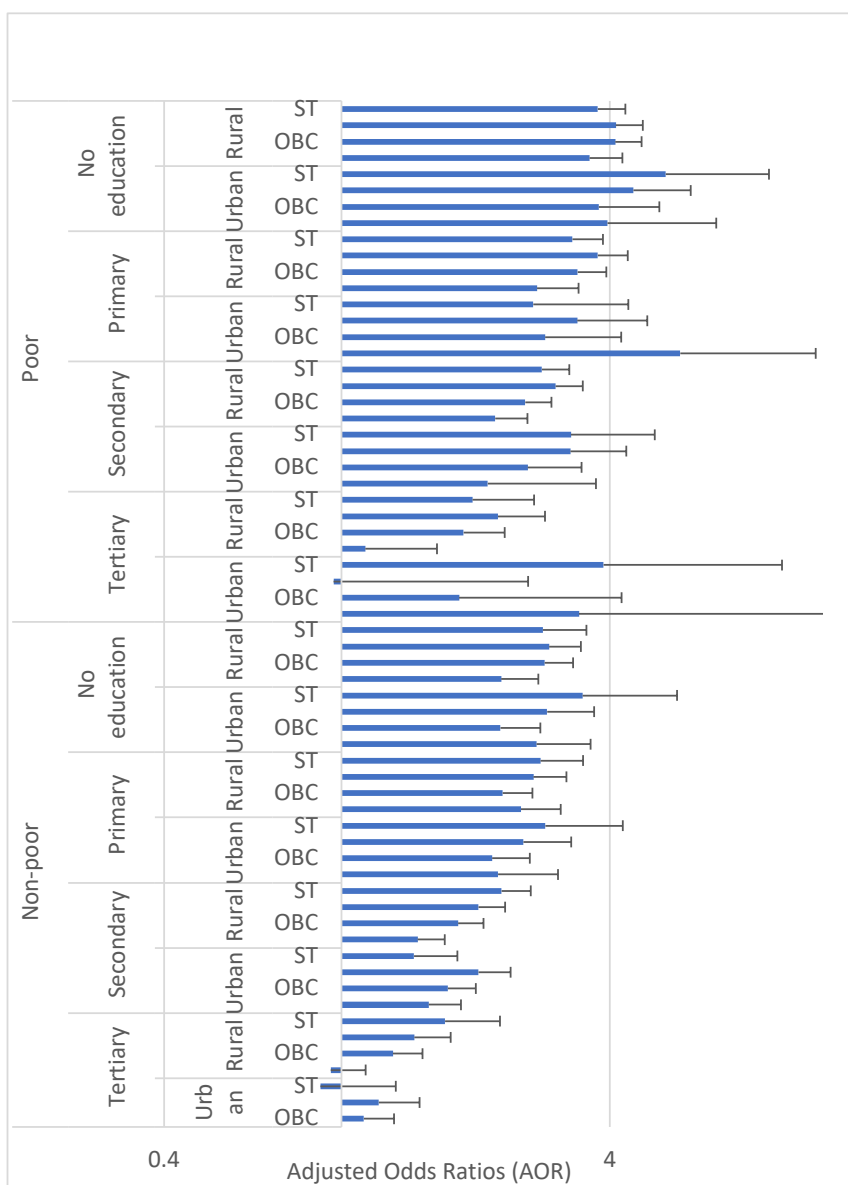

Figure S2. Graph illustrating the Adjusted Odds Ratios of the intersecting subgroups for marginalised social groups and urban/rural residence for children who were poor and had illiterate mothers in NFHS-5

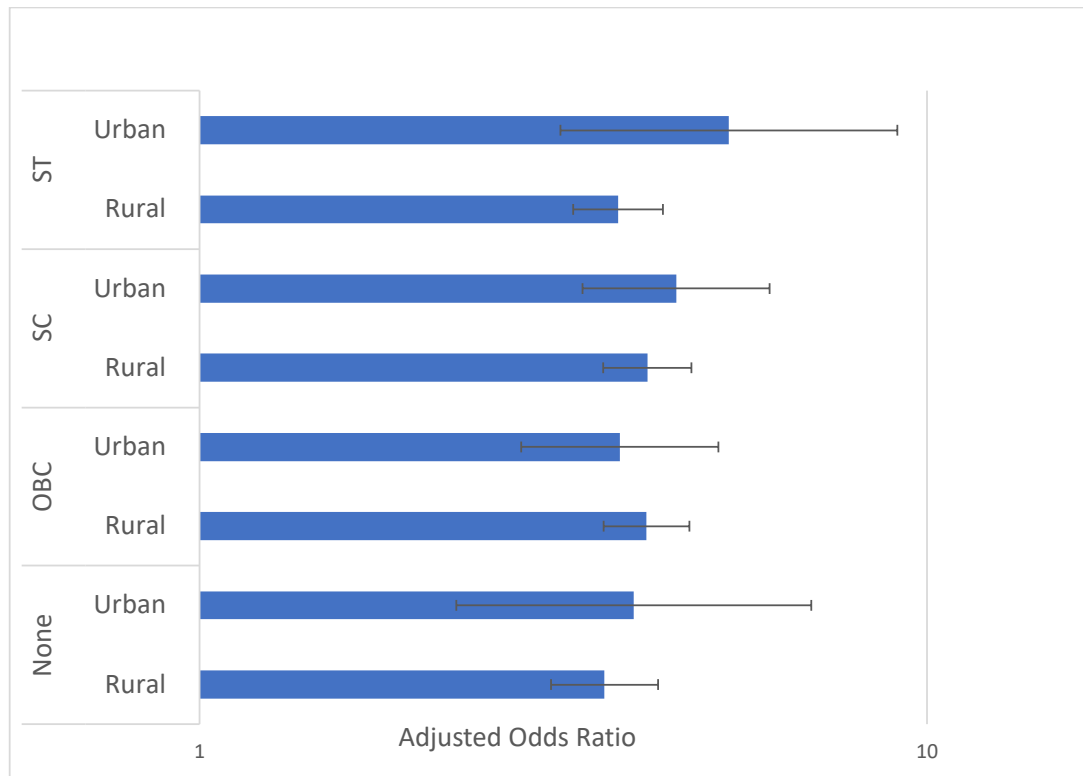

Figure S3. Graph illustrating the Adjusted Odds Ratios of the intersecting groups of marginalised social groups, urban/rural residence, household wealth, and maternal education

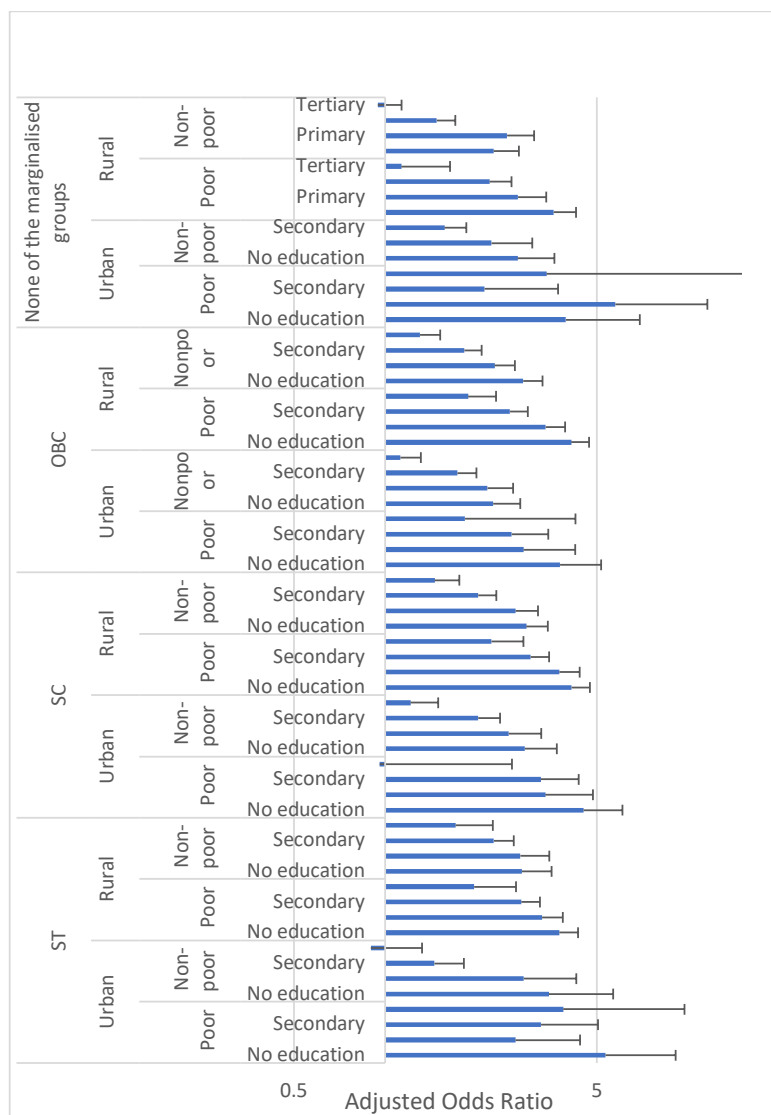

Table S5. Results of the Kitagawa-Oaxaca-Blinder Decomposition (LPM) analysis for the selected social factors using NFHS-3 coefficients as counterfactuals

|                                         | Explained Coefficients               |           | Explained Contributions (%)           |           |
|-----------------------------------------|--------------------------------------|-----------|---------------------------------------|-----------|
|                                         | Coefficients<br>(Standard<br>Errors) | P-values  | Contributions<br>(Standard<br>Errors) | P-values  |
| Wealth Group                            | -0.058<br>(0.006)                    | (<0.0001) | 45.817<br>(5.099)                     | (<0.0001) |
| Socially Marginalised<br>Groups         | 0.002<br>(0.001)                     | (0.0132)  | -1.419<br>(0.577)                     | (0.0138)  |
| Religion                                | -0.000<br>(0.000)                    | (0.4044)  | 0.203<br>(0.244)                      | (0.4042)  |
| Residence                               | 0.000<br>(0.000)                     | (0.4084)  | -0.257<br>(0.309)                     | (0.4054)  |
| Maternal Education                      | -0.018<br>(0.003)                    | (<0.0001) | 14.047<br>(2.571)                     | (<0.0001) |
| Sex of the Child                        | -0.000<br>(0.000)                    | (0.9261)  | 0.002<br>(0.018)                      | (0.9261)  |
| Age of the Child (in<br>months)         | -0.002<br>(0.001)                    | (0.0128)  | 1.928<br>(0.770)                      | (0.0123)  |
| Birth Order                             | -0.001<br>(0.001)                    | (0.4308)  | 0.799<br>(1.014)                      | (0.4309)  |
| ICDS Utilisation in the<br>last 12      | 0.002<br>(0.003)                     | (0.6078)  | -1.285<br>(2.501)                     | (0.6075)  |
| Private institutional<br>delivery       | -0.001<br>(0.001)                    | (0.2392)  | 0.544<br>(0.461)                      | (0.2385)  |
| Skilled attendants at birth             | -0.014<br>(0.004)                    | (0.0002)  | 10.785<br>(2.892)                     | (0.0002)  |
| Mother's BMI                            | -0.007<br>(0.001)                    | (<0.0001) | 5.687<br>(1.074)                      | (<0.0001) |
| Mother's Age (in years)                 | -0.001<br>(0.000)                    | (0.0649)  | 0.559<br>(0.304)                      | (0.0656)  |
| Mother's Media<br>Exposure              | 0.001<br>(0.000)                     | (0.0135)  | -0.735<br>(0.301)                     | (0.0145)  |
| Mother's Height (in cm)                 | -0.002<br>(0.001)                    | (0.1268)  | 1.230<br>(0.791)                      | (0.1200)  |
| Mother's Diet                           | -0.002<br>(0.001)                    | (0.0233)  | 1.455<br>(0.643)                      | (0.0236)  |
| Mother's age at 1st<br>birth (in years) | -0.008<br>(0.002)                    | (0.0008)  | 6.203<br>(1.853)                      | (0.0008)  |
| Household Size                          | -0.002<br>(0.001)                    | (0.0176)  | 1.234<br>(0.520)                      | (0.0176)  |
| Household Sanitation                    | -0.009<br>(0.006)                    | (0.1478)  | 6.730<br>(4.653)                      | (0.1481)  |
| Household head                          | 0.000<br>(0.000)                     | (0.4746)  | -0.249<br>(0.348)                     | (0.4745)  |
| States/UTs                              | 0.001<br>(0.001)                     | (0.4774)  | -0.751<br>(1.062)                     | (0.4797)  |
| Observations                            | 231310                               |           | 231310                                |           |

Table S6. Results of the detailed Kitagawa-Oaxaca-Blinder decomposition (LPM) using NFHS-3 coefficients as counterfactuals

|                                  | Explained Coefficients         |           | Explained Contributions (%)     |           |
|----------------------------------|--------------------------------|-----------|---------------------------------|-----------|
|                                  | Coefficients (Standard Errors) | P-values  | Contributions (Standard Errors) | P-values  |
| <b>Wealth Quintile</b>           |                                |           |                                 |           |
| Poorest                          | Ref                            | Ref       | Ref                             | Ref       |
| Poorer                           | -0.002<br>(0.001)              | (<0.0001) | 1.922<br>(0.402)                | (<0.0001) |
| Middle                           | -0.009<br>(0.001)              | (<0.0001) | 7.474<br>(1.206)                | (<0.0001) |
| Richer                           | -0.022<br>(0.003)              | (<0.0001) | 17.318<br>(2.189)               | (<0.0001) |
| Richest                          | -0.024<br>(0.003)              | (<0.0001) | 19.102<br>(2.205)               | (<0.0001) |
| <b>Marginalised Social Group</b> |                                |           |                                 |           |
| Unreserved category              | Ref                            | Ref       | Ref                             | Ref       |
| SC                               | 0.001<br>(0.000)               | (0.0112)  | -0.923<br>(0.366)               | (0.0117)  |
| ST                               | 0.000<br>(0.000)               | (0.1426)  | -0.273<br>(0.187)               | (0.1436)  |
| OBC                              | 0.000<br>(0.000)               | (0.2724)  | -0.223<br>(0.204)               | (0.2733)  |
| <b>Religion</b>                  |                                |           |                                 |           |
| Hindu                            | Ref                            | Ref       | Ref                             | Ref       |
| Muslim                           | -0.000<br>(0.000)              | (0.2804)  | 0.230<br>(0.212)                | (0.2786)  |
| Christian                        | 0.000<br>(0.000)               | (0.0999)  | -0.159<br>(0.096)               | (0.0990)  |
| Other Religion                   | -0.000<br>(0.000)              | (0.1784)  | 0.132<br>(0.099)                | (0.1808)  |
| <b>Residence</b>                 |                                |           |                                 |           |
| Rural                            | Ref                            | Ref       | Ref                             | Ref       |
| Urban                            | 0.000<br>(0.000)               | (0.4084)  | -0.257<br>(0.309)               | (0.4054)  |
| <b>Maternal Education</b>        |                                |           |                                 |           |
| Illiterate                       | Ref                            | Ref       | Ref                             | Ref       |
| Primary                          | 0.001<br>(0.000)               | (0.0056)  | -0.444<br>(0.162)               | (0.0061)  |
| Secondary                        | -0.010<br>(0.002)              | (<0.0001) | 7.966<br>(1.482)                | (<0.0001) |
| Higher                           | -0.008<br>(0.002)              | (<0.0001) | 6.525<br>(1.480)                | (<0.0001) |
| <b>Sex of the Child</b>          |                                |           |                                 |           |



|                                         |                   |          |                   |          |
|-----------------------------------------|-------------------|----------|-------------------|----------|
| Female                                  | Ref               | Ref      | Ref               | Ref      |
| Male                                    | -0.000<br>(0.000) | (0.9261) | 0.002<br>(0.018)  | (0.9261) |
| <b>Age of the Child<br/>(in months)</b> |                   |          |                   |          |
| 0                                       | Ref               | Ref      | Ref               | Ref      |
| 1                                       | 0.000<br>(0.000)  | (0.1618) | -0.177<br>(0.127) | (0.1622) |
| 2                                       | 0.000<br>(0.000)  | (0.4510) | -0.038<br>(0.050) | (0.4508) |
| (3                                      | 0.000<br>(0.000)  | (0.5878) | -0.018<br>(0.033) | (0.5876) |
| 4                                       | 0.000<br>(0.000)  | (0.6700) | -0.013<br>(0.030) | (0.6698) |
| 5                                       | -0.000<br>(0.000) | (0.3249) | 0.067<br>(0.068)  | (0.3246) |
| 6                                       | -0.000<br>(0.000) | (0.9417) | 0.004<br>(0.054)  | (0.9417) |
| 7                                       | -0.000<br>(0.000) | (0.0298) | 0.318<br>(0.147)  | (0.0300) |
| 8                                       | -0.001<br>(0.000) | (0.0140) | 0.442<br>(0.180)  | (0.0139) |
| 9                                       | -0.000<br>(0.000) | (0.7768) | 0.030<br>(0.105)  | (0.7769) |
| 10                                      | 0.000<br>(0.000)  | (0.1750) | -0.182<br>(0.134) | (0.1741) |
| 11                                      | 0.001<br>(0.000)  | (0.0029) | -0.562<br>(0.189) | (0.0029) |
| 12                                      | 0.001<br>(0.000)  | (0.0215) | -0.411<br>(0.179) | (0.0215) |
| 13                                      | 0.000<br>(0.000)  | (0.3216) | -0.218<br>(0.220) | (0.3219) |
| 14                                      | 0.000<br>(0.000)  | (0.7915) | -0.066<br>(0.249) | (0.7915) |
| 15                                      | -0.001<br>(0.000) | (0.0809) | 0.456<br>(0.261)  | (0.0811) |
| 16                                      | -0.000<br>(0.000) | (0.8630) | 0.044<br>(0.255)  | (0.8630) |
| 17                                      | -0.001<br>(0.000) | (0.0274) | 0.607<br>(0.276)  | (0.0276) |
| 18                                      | -0.001<br>(0.000) | (0.0030) | 1.162<br>(0.389)  | (0.0028) |
| 19                                      | -0.001<br>(0.000) | (0.0137) | 0.757<br>(0.307)  | (0.0136) |
| 20                                      | -0.001<br>(0.000) | (0.0952) | 0.570<br>(0.341)  | (0.0949) |

|    |                   |          |                   |          |
|----|-------------------|----------|-------------------|----------|
| 21 | -0.000<br>(0.000) | (0.6372) | 0.168<br>(0.356)  | (0.6370) |
| 22 | 0.001<br>(0.000)  | (0.1512) | -0.495<br>(0.345) | (0.1518) |
| 23 | 0.001<br>(0.000)  | (0.0017) | -0.898<br>(0.286) | (0.0017) |
| 24 | 0.001<br>(0.000)  | (0.0098) | -0.852<br>(0.332) | (0.0102) |
| 25 | 0.000<br>(0.000)  | (0.1986) | -0.367<br>(0.285) | (0.1990) |
| 26 | -0.000<br>(0.000) | (0.2752) | 0.327<br>(0.299)  | (0.2756) |
| 27 | -0.000<br>(0.000) | (0.3998) | 0.255<br>(0.303)  | (0.4001) |
| 28 | -0.000<br>(0.000) | (0.9720) | 0.009<br>(0.270)  | (0.9720) |
| 29 | 0.000<br>(0.000)  | (0.8214) | -0.062<br>(0.275) | (0.8214) |
| 30 | -0.000<br>(0.000) | (0.2464) | 0.324<br>(0.280)  | (0.2468) |
| 31 | -0.001<br>(0.000) | (0.2420) | 0.406<br>(0.347)  | (0.2420) |
| 32 | -0.000<br>(0.000) | (0.7174) | 0.127<br>(0.351)  | (0.7173) |
| 33 | -0.000<br>(0.000) | (0.2005) | 0.391<br>(0.306)  | (0.2016) |
| 34 | 0.001<br>(0.000)  | (0.0426) | -0.675<br>(0.334) | (0.0431) |
| 35 | 0.001<br>(0.000)  | (0.0257) | -0.703<br>(0.316) | (0.0261) |
| 36 | 0.000<br>(0.000)  | (0.2148) | -0.387<br>(0.313) | (0.2154) |
| 37 | -0.000<br>(0.000) | (0.2739) | 0.295<br>(0.270)  | (0.2739) |

|    |                   |          |                   |          |
|----|-------------------|----------|-------------------|----------|
| 38 | -0.000<br>(0.000) | (0.3122) | 0.316<br>(0.313)  | (0.3120) |
| 39 | -0.001<br>(0.000) | (0.0108) | 0.759<br>(0.300)  | (0.0112) |
| 40 | -0.000<br>(0.000) | (0.3090) | 0.285<br>(0.281)  | (0.3094) |
| 41 | 0.001<br>(0.000)  | (0.0204) | -0.643<br>(0.278) | (0.0207) |
| 42 | -0.000<br>(0.000) | (0.2707) | 0.334<br>(0.304)  | (0.2715) |
| 43 | -0.000<br>(0.000) | (0.5712) | 0.160<br>(0.283)  | (0.5710) |
| 44 | -0.001<br>(0.000) | (0.0015) | 1.076<br>(0.340)  | (0.0015) |

|                                            |                   |          |                   |          |
|--------------------------------------------|-------------------|----------|-------------------|----------|
| 45                                         | 0.000<br>(0.000)  | (0.1948) | -0.385<br>(0.297) | (0.1950) |
| 46                                         | -0.000<br>(0.000) | (0.6695) | 0.140<br>(0.327)  | (0.6696) |
| 47                                         | 0.000<br>(0.000)  | (0.2043) | -0.386<br>(0.304) | (0.2042) |
| 48                                         | 0.001<br>(0.000)  | (0.0023) | -1.007<br>(0.332) | (0.0024) |
| 49                                         | -0.000<br>(0.000) | (0.6016) | 0.134<br>(0.257)  | (0.6017) |
| 50                                         | 0.000<br>(0.000)  | (0.8204) | -0.052<br>(0.231) | (0.8204) |
| 51                                         | -0.001<br>(0.000) | (0.0242) | 0.618<br>(0.274)  | (0.0241) |
| 52                                         | -0.000<br>(0.000) | (0.2260) | 0.318<br>(0.263)  | (0.2264) |
| 53                                         | -0.000<br>(0.000) | (0.9109) | 0.032<br>(0.289)  | (0.9109) |
| 54                                         | -0.000<br>(0.000) | (0.7079) | 0.093<br>(0.248)  | (0.7080) |
| 55                                         | -0.000<br>(0.000) | (0.6395) | 0.129<br>(0.274)  | (0.6394) |
| 56                                         | -0.000<br>(0.000) | (0.9798) | 0.007<br>(0.273)  | (0.9798) |
| 57                                         | 0.000<br>(0.000)  | (0.8858) | -0.040<br>(0.280) | (0.8858) |
| 58                                         | -0.000<br>(0.000) | (0.2743) | 0.308<br>(0.282)  | (0.2754) |
| 59                                         | 0.001<br>(0.000)  | (0.0038) | -0.901<br>(0.312) | (0.0038) |
| <b>Birth Order</b>                         |                   |          |                   |          |
| Birth order of child is 1                  | Ref               | Ref      | Ref               | Ref      |
| Birth order of child is 2                  | 0.001<br>(0.000)  | (0.0033) | -1.144<br>(0.391) | (0.0034) |
| Birth order of child is<br>>= 3            | -0.002<br>(0.001) | (0.0949) | 1.943<br>(1.165)  | (0.0953) |
| <b>ICDS Utilization in<br/>the last 12</b> |                   |          |                   |          |
| No ICDS utilization                        | Ref               | Ref      | Ref               | Ref      |
| ICDS Utilization                           | 0.002<br>(0.003)  | (0.6078) | -1.285<br>(2.501) | (0.6075) |
| <b>Private Institutional<br/>Delivery</b>  |                   |          |                   |          |
| No                                         | Ref               | Ref      | Ref               | Ref      |
| Yes                                        | -0.001<br>(0.001) | (0.2392) | 0.544<br>(0.461)  | (0.2385) |
| <b>Skilled attendants at<br/>birth</b>     |                   |          |                   |          |

|                                               |                   |           |                   |           |
|-----------------------------------------------|-------------------|-----------|-------------------|-----------|
| No                                            | Ref               | Ref       | Ref               | Ref       |
| Yes                                           | -0.014<br>(0.004) | (0.0002)  | 10.785<br>(2.892) | (0.0002)  |
| <b>Mother's BMI</b>                           |                   |           |                   |           |
| High BMI                                      | Ref               | Ref       | Ref               | Ref       |
| Low BMI                                       | -0.007<br>(0.001) | (<0.0001) | 5.687<br>(1.074)  | (<0.0001) |
| <b>Mother's Age (in years)</b>                |                   |           |                   |           |
| Mothers' Age < 18                             | Ref               | Ref       | Ref               | Ref       |
| Mothers' Age b/w 18-30                        | 0.001<br>(0.001)  | (0.0707)  | -0.716<br>(0.399) | (0.0726)  |
| Mothers' Age > 30                             | -0.002<br>(0.001) | (0.0460)  | 1.276<br>(0.643)  | (0.0473)  |
| <b>Mother's Media Exposure</b>                |                   |           |                   |           |
| Read no news                                  | Ref               | Ref       | Ref               | Ref       |
| Read news weekly                              | 0.001<br>(0.000)  | (0.0135)  | -0.735<br>(0.301) | (0.0145)  |
| <b>Mother's Height (in cm)</b>                |                   |           |                   |           |
| Mother's Height                               | -0.002<br>(0.001) | (0.1268)  | 1.230<br>(0.791)  | (0.1200)  |
| <b>Mother's Diet Diversity</b>                |                   |           |                   |           |
| less than 4                                   | Ref               | Ref       | Ref               | Ref       |
| 4 or more type of dietary intake              | -0.002<br>(0.001) | (0.0491)  | 1.248<br>(0.636)  | (0.0497)  |
| <b>Mother's Balanced Diet</b>                 |                   |           |                   |           |
| Mother does not consume balanced diet         | Ref               | Ref       | Ref               | Ref       |
| Mother consumed balanced Diet                 | -0.000<br>(0.000) | (0.0859)  | 0.208<br>(0.121)  | (0.0852)  |
| <b>Mother's Age at First Birth (in years)</b> |                   |           |                   |           |
| Mother's age at 1st birth                     | -0.008<br>(0.002) | (0.0008)  | 6.203<br>(1.853)  | (0.0008)  |
| <b>Household Size</b>                         |                   |           |                   |           |
| No. of Household Members                      | -0.002<br>(0.001) | (0.0176)  | 1.234<br>(0.520)  | (0.0176)  |
| <b>Toilet Facility</b>                        |                   |           |                   |           |
| Has toilet                                    | Ref               | Ref       | Ref               | Ref       |
| No Toilet                                     | -0.011            | (0.0066)  | 8.586             | (0.0068)  |

|                                           |                   |          |                   |          |
|-------------------------------------------|-------------------|----------|-------------------|----------|
|                                           | (0.004)           |          | (3.170)           |          |
| <b>Safe Water Sources</b>                 |                   |          |                   |          |
| Unsafe water facility                     | Ref               | Ref      | Ref               | Ref      |
| HH has a safe water facility              | -0.001<br>(0.001) | (0.5177) | 0.640<br>(0.989)  | (0.5177) |
| <b>Sex of the Household Head</b>          |                   |          |                   |          |
| Female Head                               | Ref               | Ref      | Ref               | Ref      |
| Male Head                                 | 0.000<br>(0.000)  | (0.4746) | -0.249<br>(0.348) | (0.4745) |
| <b>Fuel Sources</b>                       |                   |          |                   |          |
| Absence of Clean Fuel                     | Ref               | Ref      | Ref               | Ref      |
| Clean Fuel Sources                        | 0.003<br>(0.004)  | (0.4675) | -2.496<br>(3.435) | (0.4675) |
| <b>State/UTs</b>                          |                   |          |                   |          |
| Andhra Pradesh<br>(includes Telengana)    | Ref               | Ref      | Ref               | Ref      |
| Arunachal Pradesh                         | 0.000<br>(0.000)  | (0.0740) | -0.024<br>(0.014) | (0.0743) |
| Assam                                     | 0.000<br>(0.000)  | (0.5579) | -0.040<br>(0.068) | (0.5583) |
| Bihar                                     | 0.000<br>(0.001)  | (0.3657) | -0.382<br>(0.424) | (0.3678) |
| Chhattisgarh                              | -0.000<br>(0.000) | (0.7187) | 0.049<br>(0.136)  | (0.7187) |
| Goa                                       | 0.000<br>(0.000)  | (0.3370) | -0.004<br>(0.004) | (0.3368) |
| Gujarat                                   | -0.001<br>(0.001) | (0.1857) | 0.782<br>(0.591)  | (0.1862) |
| Haryana                                   | -0.000<br>(0.000) | (0.7266) | 0.075<br>(0.214)  | (0.7268) |
| Himachal Pradesh                          | -0.000<br>(0.000) | (0.7380) | 0.007<br>(0.021)  | (0.7382) |
| Jammu and<br>Kashmir (includes<br>Ladakh) | -0.000<br>(0.000) | (0.2409) | 0.048<br>(0.041)  | (0.2393) |
| Jharkhand                                 | 0.000<br>(0.000)  | (0.5998) | -0.084<br>(0.160) | (0.6000) |
| Karnataka                                 | 0.000<br>(0.000)  | (0.3229) | -0.125<br>(0.127) | (0.3227) |
| Kerala                                    | -0.000<br>(0.000) | (0.4571) | 0.048<br>(0.064)  | (0.4558) |
| Madhya Pradesh                            | -0.000<br>(0.000) | (0.2365) | 0.331<br>(0.280)  | (0.2372) |
| Maharashtra                               | 0.000<br>(0.001)  | (0.3539) | -0.376<br>(0.404) | (0.3527) |
| Manipur                                   | -0.000            | (0.9556) | 0.000             | (0.9555) |

|               |                   |          |                   |          |
|---------------|-------------------|----------|-------------------|----------|
|               | (0.000)           |          | (0.008)           |          |
| Meghalaya     | 0.000<br>(0.000)  | (0.6350) | -0.021<br>(0.044) | (0.6354) |
| Mizoram       | 0.000<br>(0.000)  | (0.3916) | -0.007<br>(0.008) | (0.3918) |
| Nagaland      | 0.000<br>(0.000)  | (0.0109) | -0.058<br>(0.023) | (0.0110) |
| Delhi         | 0.001<br>(0.000)  | (0.0010) | -0.481<br>(0.148) | (0.0011) |
| Odisha        | 0.000<br>(0.000)  | (0.4462) | -0.089<br>(0.118) | (0.4471) |
| Punjab        | -0.000<br>(0.000) | (0.2589) | 0.125<br>(0.112)  | (0.2614) |
| Rajasthan     | 0.000<br>(0.000)  | (0.8565) | -0.023<br>(0.127) | (0.8564) |
| Sikkim        | 0.000<br>(0.000)  | (0.1283) | -0.009<br>(0.006) | (0.1279) |
| Tamil Nadu    | -0.001<br>(0.000) | (0.0663) | 0.487<br>(0.263)  | (0.0642) |
| Tripura       | 0.000<br>(0.000)  | (0.2913) | -0.043<br>(0.041) | (0.2921) |
| Uttar Pradesh | 0.000<br>(0.001)  | (0.5917) | -0.378<br>(0.707) | (0.5931) |
| Uttarakhand   | -0.000<br>(0.000) | (0.9327) | 0.005<br>(0.059)  | (0.9327) |
| West Bengal   | 0.001<br>(0.000)  | (0.1324) | -0.562<br>(0.376) | (0.1349) |
| Observations  | 231310            |          | 23130             |          |

*Table S7. Results for the Kitagwa-Oaxaca-Blinder decomposition (Logit) for changes in stunting prevalence between NFHS-3 and NFHS-5 using NFHS-3 coefficients as counterfactuals*

| <b>Panel A: Changes in mean prevalence</b> | <b>All India Aggregate</b>                              |                 |
|--------------------------------------------|---------------------------------------------------------|-----------------|
|                                            | <b>Coefficients/Contributions<br/>(Standard Errors)</b> | <b>P-values</b> |
| Stunting in NFHS-5                         | 0.357<br>(0.002)                                        | (<0.0001)       |
| Stunting in NFHS-3                         | 0.484<br>(0.004)                                        | (<0.0001)       |
| Total Change                               | -0.127<br>(0.005)                                       | (<0.0001)       |
| Explained                                  | -0.115<br>(0.007)                                       | (<0.0001)       |
| Explained Contribution (%)                 | 91.132<br>(5.930)                                       | (<0.0001)       |
| Unexplained                                | -0.011<br>(0.008)                                       | (0.1438)        |
| Unexplained Contribution (%)               | 8.868<br>(5.930)                                        | (0.1348)        |

Table S8. Results for the detailed Kitigawa-Oaxaca-Blinder decomposition (Logit) using NFHS-3 coefficients as counterfactuals for the predictor and control variables

|                                  | Explained Coefficients         |           | Explained Contributions (%)     |           |
|----------------------------------|--------------------------------|-----------|---------------------------------|-----------|
|                                  | Coefficients (Standard Errors) | P-values  | Contributions (Standard Errors) | P-values  |
| <b>Wealth Quintile</b>           |                                |           |                                 |           |
| Poorest                          | Ref                            | Ref       | Ref                             | Ref       |
| Poorer                           | -0.002<br>(0.000)              | (<0.0001) | 1.769<br>(0.376)                | (<0.0001) |
| Middle                           | -0.009<br>(0.001)              | (<0.0001) | 7.015<br>(1.158)                | (<0.0001) |
| Richer                           | -0.021<br>(0.003)              | (<0.0001) | 16.887<br>(2.182)               | (<0.0001) |
| Richest                          | -0.026<br>(0.003)              | (<0.0001) | 20.162<br>(2.291)               | (<0.0001) |
| <b>Marginalised Social Group</b> |                                |           |                                 |           |
| Unreserved category              | Ref                            | Ref       | Ref                             | Ref       |
| SC                               | 0.001<br>(0.000)               | (0.0095)  | -0.925<br>(0.359)               | (0.0100)  |
| ST                               | 0.000<br>(0.000)               | (0.1279)  | -0.281<br>(0.185)               | (0.1288)  |
| OBC                              | 0.000<br>(0.000)               | (0.2419)  | -0.238<br>(0.204)               | (0.2429)  |
| <b>Residence</b>                 |                                |           |                                 |           |
| Rural                            | Ref                            | Ref       | Ref                             | Ref       |
| Urban                            | 0.000<br>(0.000)               | (0.4089)  | -0.251<br>(0.302)               | (0.4060)  |
| <b>Maternal Education</b>        |                                |           |                                 |           |
| Illiterate                       | Ref                            | Ref       | Ref                             | Ref       |
| Primary                          | 0.000<br>(0.000)               | (0.0078)  | -0.392<br>(0.149)               | (0.0084)  |
| Secondary                        | -0.009<br>(0.002)              | (<0.0001) | 7.081<br>(1.390)                | (<0.0001) |
| Higher                           | -0.010<br>(0.002)              | (<0.0001) | 7.888<br>(1.666)                | (<0.0001) |
| <b>Sex of the Child</b>          |                                |           |                                 |           |
| Female                           | Ref                            | Ref       | Ref                             | Ref       |
| Male                             | -0.000<br>(0.000)              | (0.9221)  | 0.002<br>(0.018)                | (0.9221)  |



Table S9. Results of the Kitigawa-Oaxaca- Blinder decomposition using NFHS-5 coefficients as counterfactuals

| Panel A: Changes in mean prevalence | All India Aggregate                           |           |
|-------------------------------------|-----------------------------------------------|-----------|
|                                     | Co-efficients/Contributions (Standard Errors) | P-values  |
| Stunting in NFHS-5                  | 0.357<br>(0.002)                              | (<0.0001) |
| Stunting in NFHS-3                  | 0.484<br>(0.004)                              | (<0.0001) |
| Total Change                        | -0.127<br>(0.005)                             | (<0.0001) |
| Explained                           | -0.086<br>(0.004)                             | (<0.0001) |
| Explained Contribution (%)          | 68.047<br>(3.676)                             | (<0.0001) |
| Unexplained                         | -0.040<br>(0.006)                             | (<0.0001) |
| Unexplained Contribution (%)        | 31.953<br>(3.676)                             | (<0.0001) |
